# Supplementary material
Source: publisher figshare collection journal article supplement (https://sage.figshare.com/ndownloader/files/31478582)
Supplement: Supplementary file 1 [file 31478582]

**Letter to the Editors of *Psychological Science*: Boosting Understanding is Unlikely to Correct False Beliefs About Most Science Domains:**

**Regarding van Stekelenburg et al. (2021)**

Van Stekelenburg and colleagues (2021) show that boosting understanding of scientific consensus reduces false beliefs about genetically modified foods (GMOs). Specifically, demonstrating the value of scientific consensus and providing information about scientific consensus on GMOs helps to correct misperceptions about GMOs being harmful. However, this technique is ineffective in reducing climate change misbeliefs. This is not surprising. We argue that the reported strategy, being a knowledge-based technique, has limited applicability to other contentious science domains. This is because misperceptions of such domains often do not involve poor science knowledge, but rather specific ideologies.

The strategy of boosting understanding and providing information about scientific consensus relies on the idea that false beliefs about science stem from a lack of reasoning skills and science knowledge. While science knowledge has long been thought to contribute to greater science acceptance, this is not the case for many science domains. For example, climate change skepticism is primarily associated with conservatism (Hornsey et al., 2016; Rutjens et al., 2021), whilst rejection of evolution and nanotechnology is associated with religiosity (Rutjens et al., 2021; Vandermoere et al., 2010). Skepticism towards artificial intelligence (AI) involves worries about losing one’s job (e.g., Vu & Lim, 2021). Further, vaccination skepticism is primarily associated with spirituality and conspiracy thinking, though there is evidence for science knowledge to play an additional role (Rutjens et al., 2021). Overall, ample empirical evidence indicates that science misperceptions are more strongly linked to different ideologies or worldviews than to science knowledge (Hornsey et al., 2018; Rutjens et al., 2021).

The one glaring exception to this is, indeed, GMOs skepticism. Evidence consistently shows that GMOs misperceptions are not associated with ideology/worldviews. Instead, these are primarily related to low science knowledge (Rutjens et al., 2021). Not surprisingly, evidence shows that educating people about GMOs leads to an increase in acceptance (McPhetres et al., 2019).

Although people can update their beliefs when provided with evidence about a political issue (Kim, 2020; Tappin et al., 2021), factual knowledge can, in fact, polarize science attitudes (Drummond & Fischhoff, 2017). Providing evidence may therefore have different consequences for science beliefs than for policy evaluations (see Rutjens & Brandt, 2018).

Overall, the consensus boosting strategy is likely to be effective only for correcting misbeliefs about science domains that are not primarily rooted in ideologies and worldviews. That is, evolution, nanotechnology, and AI can be added to climate change as science domains for which the boosting strategy will *not* work in correcting false beliefs. Yet, it is possible that the boosting strategy which van Stekelenburg et al. describe might be somewhat effective in reducing vaccine misperceptions. However, a more promising strategy in tackling vaccine misbeliefs—which involve spirituality (Rutjens et al., 2021) and conspiracy thinking (Hornsey et al., 2018)—would be an application of both: knowledge strategies (like consensus-boosting) and tailored science messaging to match individual ideological beliefs.

To conclude, boosting understanding of and educating people about scientific consensus may help to correct false beliefs in specific science domains. However, the effectiveness of this strategy would be limited to false beliefs that are largely free from ideology, as is the case with beliefs about GMOs.

Natalia Zarzeczna

*Department of Social Psychology, University of Amsterdam*

[n.j.zarzeczna@uva.nl](mailto:n.j.zarzeczna@uva.nl)

Bojana Većkalov

*Department of Social Psychology, University of Amsterdam*

Vukašin Gligorić

*Department of Social Psychology, University of Amsterdam*

Bastiaan T. Rutjens

*Department of Social Psychology, University of Amsterdam*

**References**

Drummond, C., & Fischhoff, B. (2017). Individuals with greater science literacy and education have more polarized beliefs on controversial science topics. *Proceedings of the National Academy of Sciences*, *114*(36), 9587–9592. https://doi.org/10.1073/pnas.1704882114

Hornsey, M. J., Harris, E. A., Bain, P. G., & Fielding, K. S. (2016). Meta-analyses of the determinants and outcomes of belief in climate change. *Nature Climate Change*, *6*(6), 622–626. https://doi.org/10.1038/nclimate2943

Hornsey, M. J., Harris, E. A., & Fielding, K. S. (2018). The psychological roots of anti-vaccination attitudes: A 24-nation investigation. *Health Psychology*, *37*(4), 307–315. https://doi.org/10.1037/hea0000586

Kim, W. J. (2020). *Evidence can change partisan minds: Rethinking the bounds of partisan-motivated reasoning* [Working paper]*.* https://jinwookimqssdotcom.files.wordpress.com/2020/08/aca-paper.pdf

McPhetres, J., Rutjens, B. T., Weinstein, N., & Brisson, J. A. (2019). Modifying attitudes about modified foods: Increased knowledge leads to more positive attitudes. *Journal of Environmental Psychology*, *64*, 21–29. https://doi.org/10.1016/j.jenvp.2019.04.012

Rutjens, B. T., & Brandt, M. J. (2018). Introduction. In B. T. Rutjens & M. J. Brandt (Eds.), *Belief systems and the perception of reality* (pp. 1–6)*.* Routledge.

Rutjens, B. T., Sengupta, N., van der Lee, R., van Koningsbruggen, G. M., Martens, J. P., Rabelo, A., & Sutton, R. M. (2021). Science skepticism across 24 countries. *Social Psychological and Personality Science*. Advance online publication. https://doi.org/10.1177/19485506211001329

Tappin, B. M., Berinsky, A. J., & Rand, D. G. (2021). *Exposure to arguments and evidence changes partisan attitudes even in the face of countervailing leader cues.* PsyArXiv.https://doi.org/10.31234/osf.io/247bs

Vandermoere, F., Blanchemanche, S., Bieberstein, A., Marette, S., & Roosen, J. (2010). The morality of attitudes toward nanotechnology: About God, techno-scientific progress, and interfering with nature. *Journal of Nanoparticle Research*, *12*(2), 373–381. https://doi.org/10.1007/s11051-009-9809-5

van Stekelenburg, A., Schaap, G., Veling, H., & Buijzen, M. (2021). Boosting understanding and identification of scientific consensus can help to correct false beliefs. *Psychological Science, 32*(10), 1549–1565. https://doi.org/10.1177/09567976211007788

Vu, H. T., & Lim, J. (2021). Effects of country and individual factors on public acceptance of artificial intelligence and robotics technologies: A multilevel SEM analysis of 28-country survey data. *Behaviour & Information Technology*. Advance online publication. https://doi.org/10.1080/0144929X.2021.1884288
